# Supplementary material for: CO2-responsive surfactants for switchable Pickering emulsions with a recyclable aqueous phase
Source: Royal Society of Chemistry journal article supplement (doi:10.1039/d2gc02630a), 2022-01-01
Supplement: d2gc02630a1.pdf [file d2gc02630a1.pdf]

## Supporting Information

### **CO<sub>2</sub>-responsive Surfactant for Switchable Pickering Emulsions with Recyclable Aqueous Phase**

Huaxin Li, Yunshan Liu, Jianzhong Jiang \*

The Key Laboratory of Synthetic and Biological Colloids, Ministry of Education, School of  
Chemical and Material Engineering, Jiangnan University, 1800 Lihu Road, Wuxi, Jiangsu, P.R.

China. E-mail: [jzjiang@jiangnan.edu.cn](mailto:jzjiang@jiangnan.edu.cn)

No. of figures: 11

No. of tables: 3

No. of pages: 9

## 1. Calculation of HLB value

For ionic surfactants, the HLB value is calculated using the additive method <sup>[1,2]</sup>. That is to specify a value for each group that constitutes the surfactant molecule, and then use the following formula to calculate the HLB value of the surfactant:

$$\text{HLB}=7+ \text{HLB}_{(\text{hydrophilic groups})} + \text{HLB}_{(\text{hydrophobic groups})}$$

**Table S1** HLB values of some common groups <sup>[2]</sup>

| hydrophilic groups               | HLB value | hydrophobic groups                | HLB value |
|----------------------------------|-----------|-----------------------------------|-----------|
| -SO <sub>4</sub> Na              | 38.7      | -CH=                              | -0.475    |
| -COOK                            | 21.1      | -CH <sub>2</sub> -                | -0.475    |
| -SO <sub>3</sub> Na              | 11        | -CH <sub>3</sub>                  | -0.475    |
| -N= (Tertiary amine)             | 9.4       | -C <sub>3</sub> H <sub>6</sub> O- | -0.15     |
| Esters (Sorbitol Ring)           | 6.8       | -CF <sub>2</sub>                  | -0.87     |
| -COOR (ester group)              | 2.4       | -CF <sub>3</sub>                  | -0.87     |
| -COOH                            | 2.1       |                                   |           |
| -OH (free)                       | 1.9       |                                   |           |
| -O- (ether group)                | 1.3       |                                   |           |
| -OH (Sorbitol Ring)              | 0.5       |                                   |           |
| -C <sub>2</sub> H <sub>4</sub> O | 0.33      |                                   |           |

## 2. Determination of adsorption amount and molecular cross-sectional area of NCOONa/N<sup>+</sup>COONa on alumina nanoparticle/water interface <sup>[3]</sup>

Prepare a solution containing NCOONa/N<sup>+</sup>COONa and alumina nanoparticles. The solution was dispersed by FS-250N ultrasonic processor for 20 s, and then placed in a constant temperature oven at 25 °C for 4 h, and the surface tension was measured to obtain the surface tension ( $\gamma_{s,p}$ ). Plot the  $\gamma_{s,p}-\lg C_{s,p}(i)$  and  $\gamma_s-\lg C_s$ , and further obtain the concentration difference ( $\Delta C$ ) and the adsorption capacity of the active agent at the particle/water interface ( $\Gamma_s(p/w)$ ):

$$\Gamma_s(p/w) = \frac{V\Delta C}{x} = \frac{V[C_{s,p}(i) - C_{s,p}(e)]}{x}$$

Among them, “ $C_{s,p}(i)$ ” is the initial concentration of surfactant in the dispersion (mol/L),

“ $C_{s,p}(e)$ ” is the equilibrium concentration (mol/L), “ $V$ ” is the volume of dispersion liquid (ml), “ $x$ ” is the mass of particles contained in the dispersion (g).

Then, by plotting  $\Gamma_s(p/w)$  against  $C_{s,p}(e)$ , the adsorption isotherm of the surfactant at the particle/water interface can be obtained. The cross-sectional area of surfactant molecules at the solid particle/water interface ( $a_s(p/w)$ ), after obtaining the amount of surfactant adsorbed at the particle/water interface, can be obtained by the following formula:

$$a_s(p/w) = \frac{10^{21} S_p}{N \Gamma_s(p/w)}$$

Among them, “ $S_p$ ” is the specific surface area of the particle (m<sup>2</sup>/g).

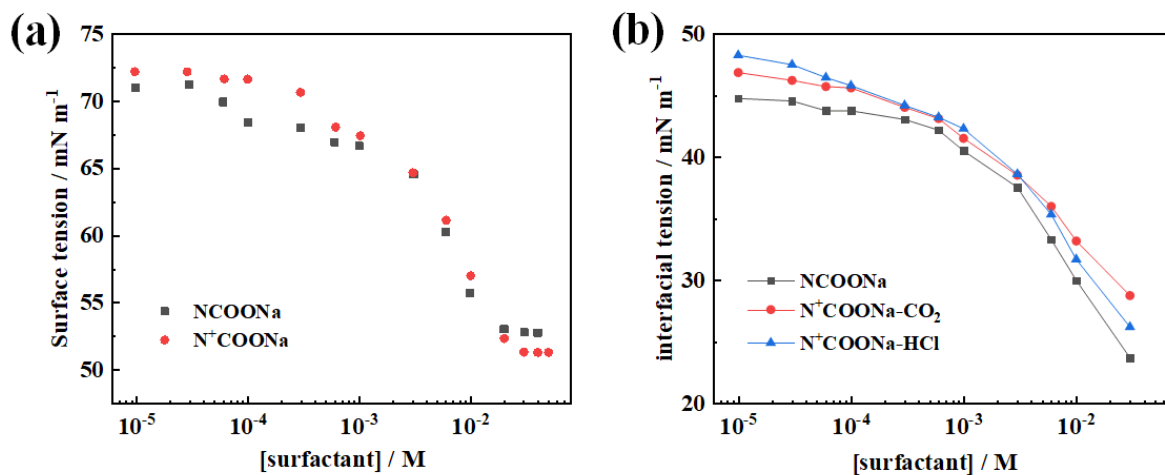

**Figure S1.** Surface tension (a) /interfacial tension (b) curves of NCOONa/N<sup>+</sup>COONa at different concentrations

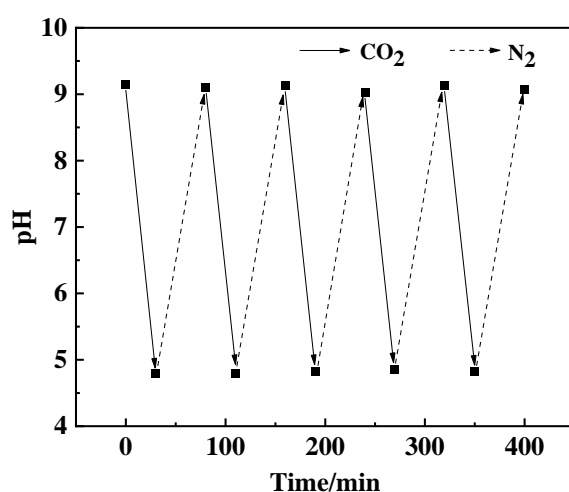

**Figure S2.** The pH value of NCOONa solution (0.3 mM) after bubbling CO<sub>2</sub> and N<sub>2</sub> alternately.

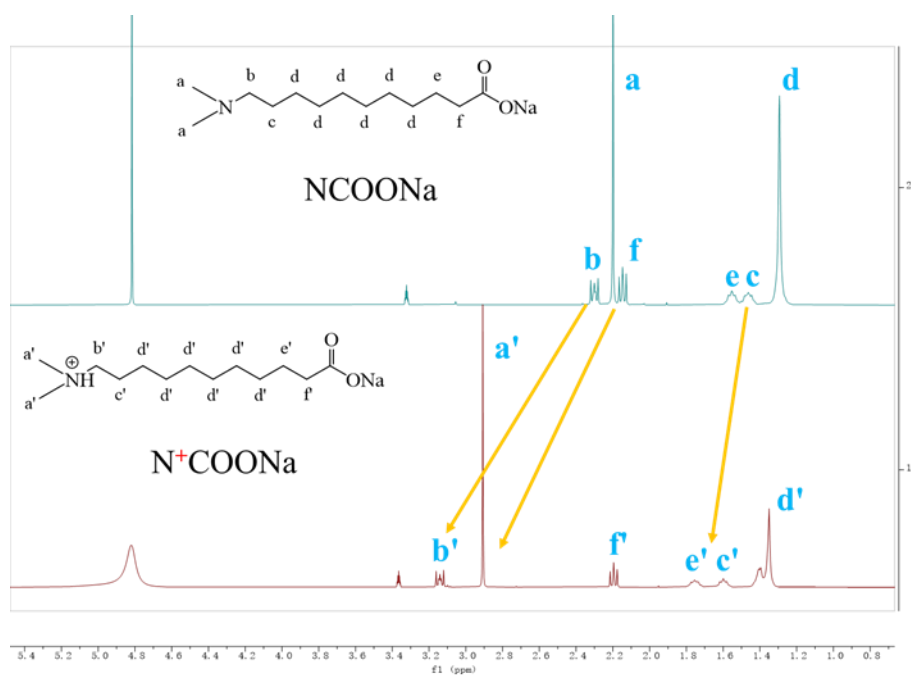

**Figure S3.** <sup>1</sup>H-NMR spectrum of NCOONa before (upper) and after (lower) bubbling CO<sub>2</sub> (CD<sub>3</sub>OD/D<sub>2</sub>O).

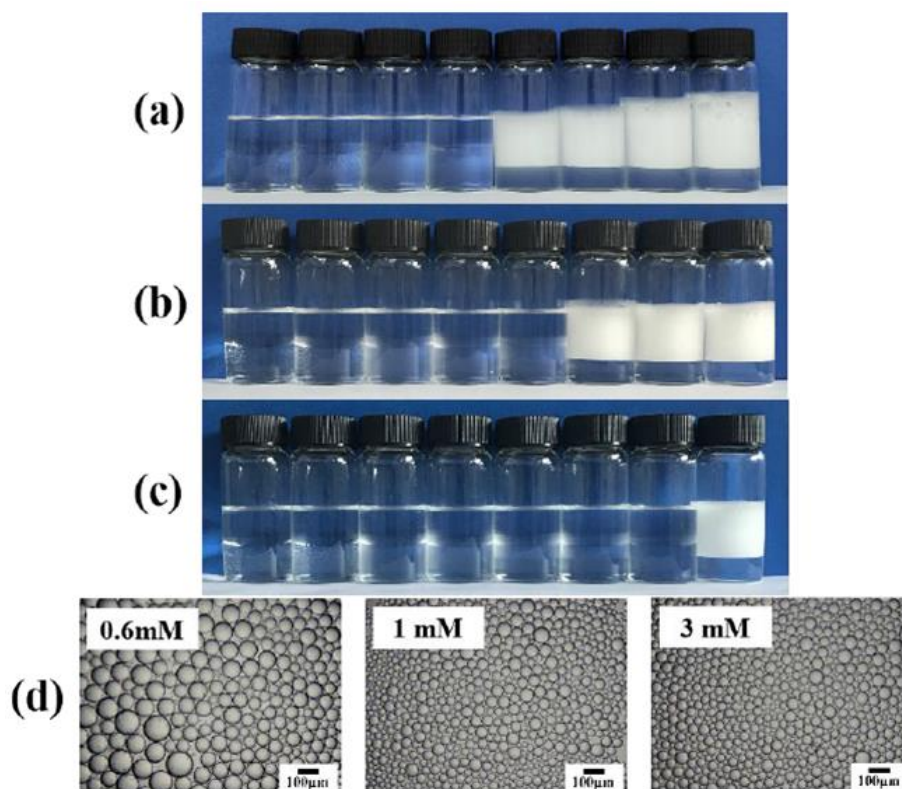

**Figure S4.** Photos of emulsions (*n*-octane/water) prepared by NCOONa at different concentration (from left to right for a and b): 0.01, 0.03, 0.06, 0.1, 0.3, 0.6, 1, 3 mM and as shown for (d), taken (a) immediately, and (b and d) 24 h, and (c) 48 h after preparation.

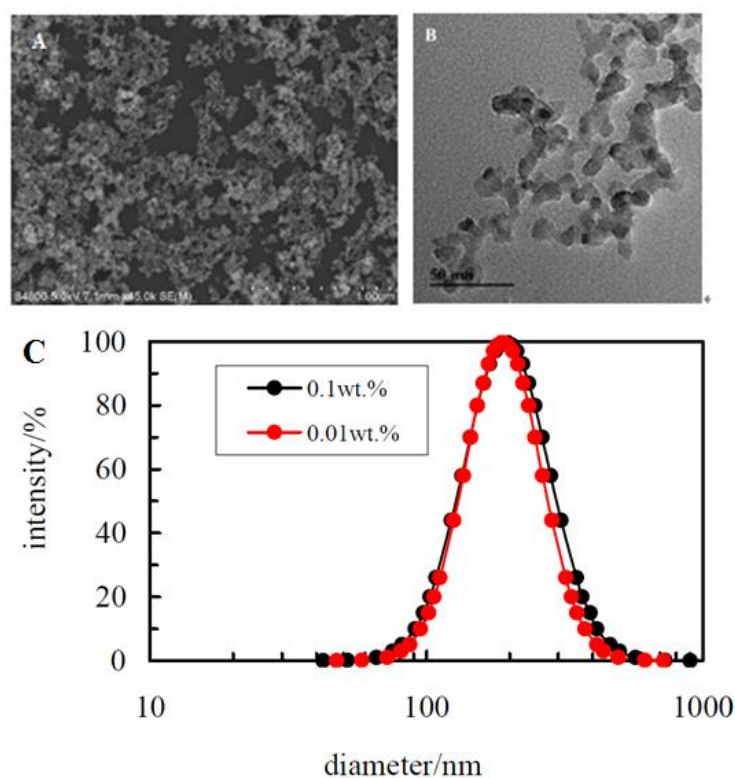

**Figure S5.** (A) SEM and (B) TEM images of alumina nanoparticles and (C) size distribution of 0.1 wt.% and 0.01 wt.% alumina nanoparticles dispersed in pure water by ultrasonication at neutral pH ( $\sim 6.8$ ) at 25 °C. The z-average diameter of the particles in water after ultrasonication is  $\sim 192$  nm.

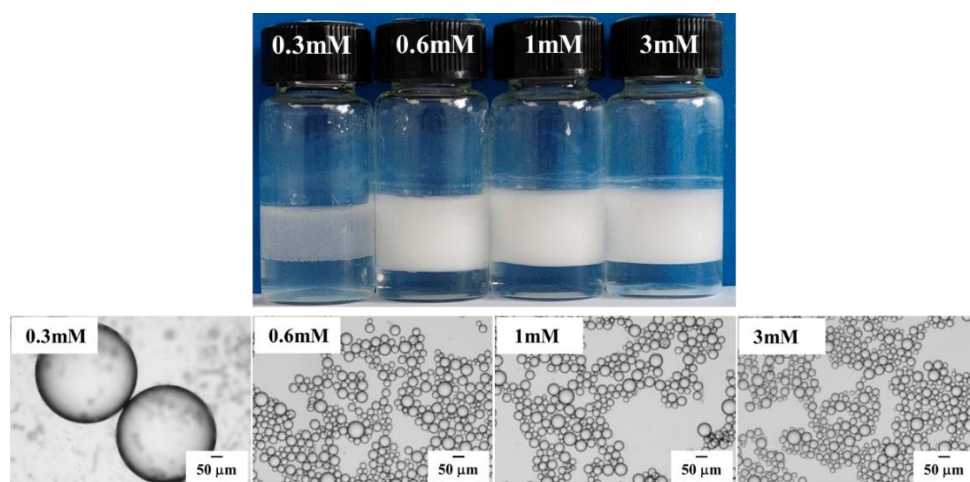

**Figure S6.** The photos of the Pickering emulsions (*n*-octane/water) prepared from NCOONa and 0.1 wt.% alumina particles after five months of stabilization: from left to right NCOONa concentrations are: 0.3, 0.6, 1, 3 mM.

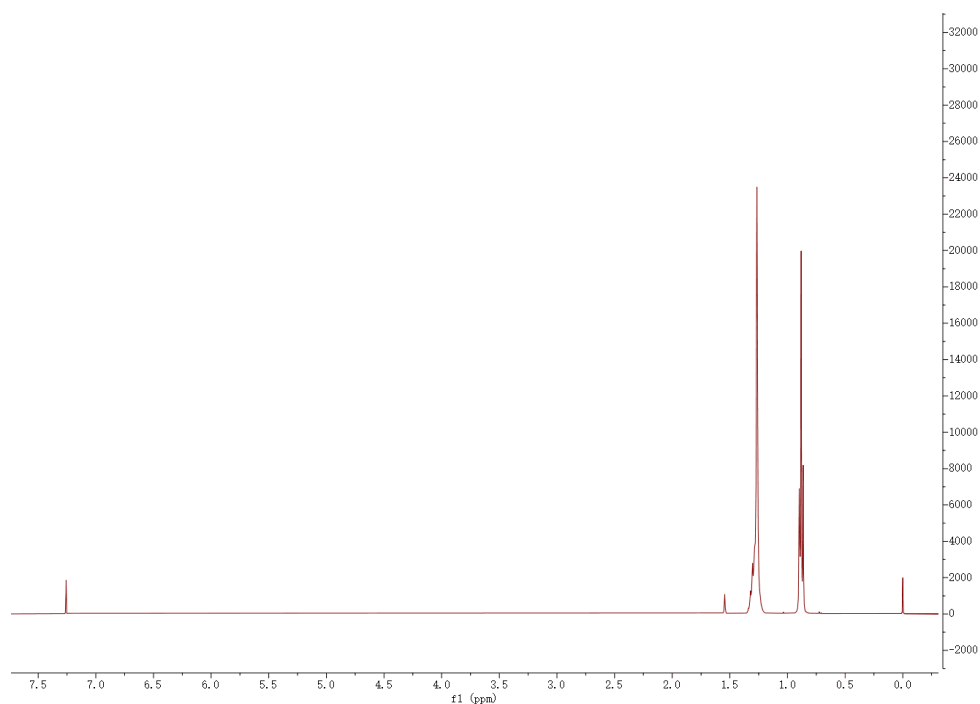

**Figure S7.**  $^1\text{H}$ -NMR spectrum of the separated *n*-octane after demulsification.

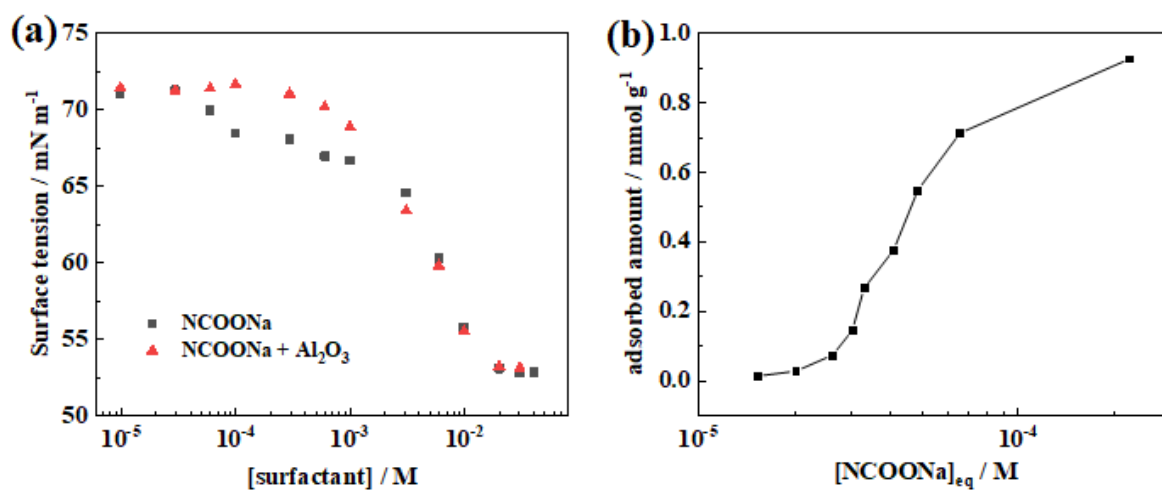

**Figure S8.** (a) The surface tension curves of NCOONa solution before and after adding alumina particles, (b) The curve of the adsorbed amount of NCOONa on the surface of alumina particles as a function of the equilibrium concentration of NCOONa in solution.

**Table S2.** Surface activity parameters of NCOONa and N<sup>+</sup>COONa.  $\Gamma^\infty$  and  $A$  are the saturated surface concentration and area per surfactant molecule respectively.

| Surfactant           | cmc(mM) | $\gamma_{\text{cmc}}$ (mN/m) | $\Gamma^\infty$ ( $10^{-10}$ mol/cm <sup>2</sup> ) | $A$ (nm <sup>2</sup> /molec.) |
|----------------------|---------|------------------------------|----------------------------------------------------|-------------------------------|
| NCOONa               | 16.47   | 52.76                        | 3.08                                               | 0.54                          |
| N <sup>+</sup> COONa | 21.78   | 51.33                        | 1.83                                               | 0.91                          |

**Table S3.** Adsorption amount and molecular cross-sectional area of NCOONa on alumina particles -water interface

| Surfactant | $C_{s,p}(i)$ (mM) | $C_{s,p}(e)$ (mM) | $\Gamma_s(p/w)$ (mmol g <sup>-1</sup> ) | $a_s(p/w)$ (nm <sup>2</sup> molec <sup>-1</sup> ) |
|------------|-------------------|-------------------|-----------------------------------------|---------------------------------------------------|
| NCOONa     | 0.3               | 0.033             | 0.266                                   | 0.562                                             |
|            | 1                 | 0.223             | 0.92                                    | 0.16                                              |

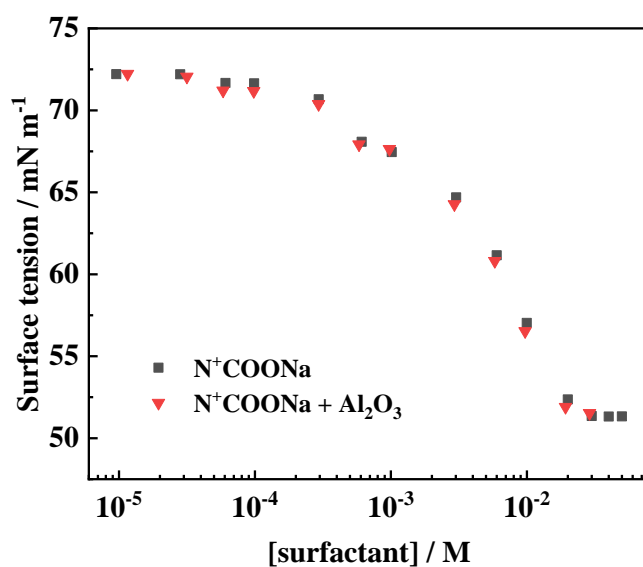

**Figure S9.** The surface tension of N<sup>+</sup>COONa solution before and after addition of alumina particles.

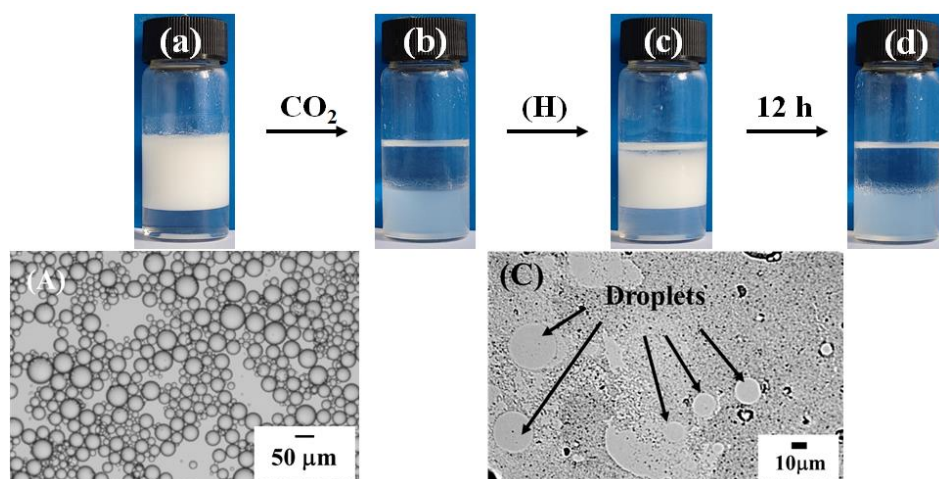

**Figure S10.** The photos and selected micrographs of the emulsion. (a) the emulsion stabilized by NCOONa (0.6 mM) and alumina particles (0.1 wt.%); (b) demulsification after bubbling CO<sub>2</sub>; (c) the emulsion stabilized by N<sup>+</sup>COONa and alumina particles after re-homogenization (b); (d) photo of (c) taken 12h after preparation. (A) micrographs of the emulsion in (a); (c) micrographs of the dried emulsion in (c).

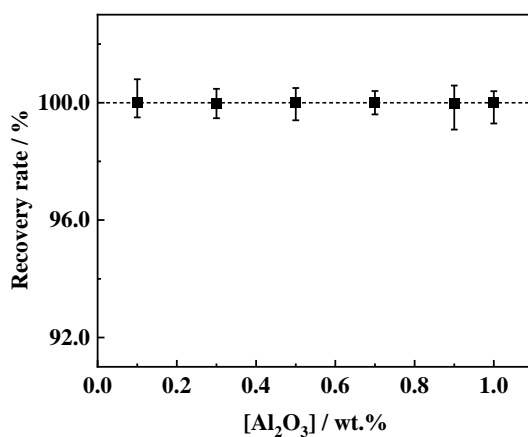

**Figure S11** The recovery rate of alumina particles after demulsification by bubbling CO<sub>2</sub>.

## References

- [1]. J.T. Davies. Proceedings of 2nd International Congress Surface Activity, 1957, 426-438.
- [2]. M.J. Rosen, J.T. Kunjappu. Surfactants and interfacial phenomena, Wiley, 2012
- [3]. K. N. Gascon, S. J. Weinstein and M. G. Antoniadis, Journal of Chemical Education, 2019, 96, 342-347.
